# Supplementary material for: A Tale of Two Biomarkers: Untargeted 1H NMR Metabolomic Fingerprinting of BHBA and NEFA in Early Lactation Dairy Cows
Source: MDPI journal article supplement (doi:10.3390/metabo10060247), 2020-06-15
Supplement: s1 [file s1]

## Supplementary Material

**Table S1.**  $^1\text{H}$  NMR chemical shifts ( $\delta$ ) and multiplicity of metabolites in bovine serum run in deuterated water ( $\text{D}_2\text{O}$ ). Clearly observed resonances are indicated in bold text. s, singlet; d, doublet; dd, doublet of a doublet; m, multiplet; t, triplet. The right two columns show the direction of the relationship with serum  $\beta$ -hydroxybutyrate (BHBA) and non-esterified fatty acid (NEFA) concentrations determined by colorimetric assays. \* = tentative identification.

|    | Metabolite               | Chemical shift ( $\delta$ ) and multiplicity                                                                                                                       | BHBA | NEFA |
|----|--------------------------|--------------------------------------------------------------------------------------------------------------------------------------------------------------------|------|------|
| 1  | cholate*                 | <b>0.70 (m)</b> , 0.91 (m), 0.96 (m), 1.43 (m), 1.87 (m), 2.10 (m), 2.22 (m), 3.65 (m), 4.06 (t)                                                                   | -    | ↓    |
| 2  | LDL/VLDL                 | <b>0.86 (m)</b> , <b>1.25 (m)</b>                                                                                                                                  | ↑    | ↑    |
| 3  | leucine                  | <b>0.94 (d)</b> , <b>0.95 (d)</b> , 1.66 (m), 1.66 (m), 1.73 (m), 3.72 (m)                                                                                         | -    | ↑    |
| 4  | isoleucine               | <b>0.93 (t)</b> , <b>1.00 (d)</b> , 1.24 (m), 1.45 (m), 1.45 (m), 3.66 (d)                                                                                         | -    | ↓    |
| 5  | valine                   | <b>0.98 (d)</b> , <b>1.03 (d)</b> , 2.26 (m), 3.60 (d)                                                                                                             | ↓    | ↓    |
| 6  | $\beta$ -hydroxybutyrate | <b>1.20 (d)</b> , <b>2.31 (m)</b> , <b>2.41 (m)</b> , <b>4.16 (m)</b>                                                                                              | ↑    | ↑    |
| 7  | lactate                  | <b>1.31 (d)</b> , 4.31 (q)                                                                                                                                         | ↓    | ↓    |
| 8  | alanine                  | <b>1.46 (d)</b> , 3.77 (q)                                                                                                                                         | ↓    | ↓    |
| 9  | acetate                  | <b>1.9 (s)</b>                                                                                                                                                     | ↑    | ↓    |
| 10 | N-acetyl glycoprotein    | <b>2.03 (m)</b>                                                                                                                                                    | ↑    | ↑    |
| 11 | pyruvate                 | <b>2.46 (s)</b> , 7.65 (s)                                                                                                                                         | -    | ↓    |
| 12 | citrate                  | <b>2.52 (d)</b> , <b>2.66 (d)</b>                                                                                                                                  | -    | -    |
| 13 | creatine                 | <b>3.02 (s)</b> , <b>3.92 (s)</b>                                                                                                                                  | ↑    | ↓    |
| 14 | phosphocreatine          | <b>3.03 (s)</b> , <b>3.93 (s)</b>                                                                                                                                  | -    | -    |
| 15 | dimethyl sulfone         | <b>3.14 (s)</b>                                                                                                                                                    | ↓    | -    |
| 16 | choline                  | <b>3.19 (s)</b> , 3.50 (m), 4.05 (m)                                                                                                                               | -    | -    |
| 17 | phosphocholine           | <b>3.21 (s)</b> , 3.58 (t), 4.17 (m)                                                                                                                               | ↑    | ↑    |
| 18 | betaine                  | <b>3.25 (s)</b> , 3.89 (s)                                                                                                                                         | ↑    | -    |
| 19 | methanol                 | <b>3.34 (s)</b>                                                                                                                                                    |      |      |
| 20 | glucose                  | <b>3.23 (dd)</b> , <b>3.40 (m)</b> , <b>3.46 (m)</b> , <b>3.52 (dd)</b> , <b>3.73 (m)</b> , <b>3.82 (m)</b> , <b>3.89 (dd)</b> , <b>4.63 (d)</b> , <b>5.22 (d)</b> | ↓    | ↓    |
| 21 | glycine                  | <b>3.50 (s)</b>                                                                                                                                                    | ↑    | ↑    |
| 22 | $\beta$ -glucose         | <b>4.63 (d)</b>                                                                                                                                                    | ↓    | ↓    |
| 23 | $\alpha$ -glucose        | <b>5.22 (d)</b>                                                                                                                                                    | ↓    | ↓    |
| 24 | 3-phenyllactate*         | <b>2.87 (dd)</b> , 3.09 (dd), 4.26 (dd), <b>7.31 (m)</b> , <b>7.39 (m)</b>                                                                                         | -    | -    |
| 25 | hippurate                | 3.96 (d), <b>7.54 (m)</b> , <b>7.62 (m)</b> , <b>7.83 (dd)</b>                                                                                                     | -    | -    |
| 26 | formate                  | <b>8.44 (s)</b>                                                                                                                                                    | -    | -    |

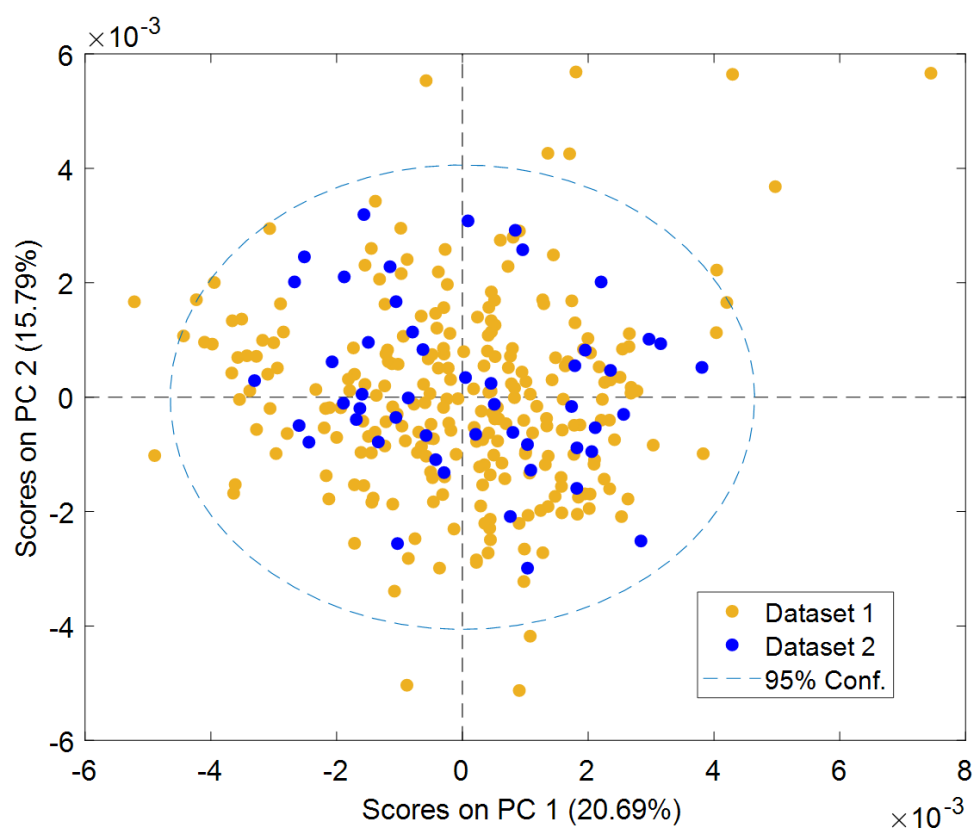

**Figure S1.** Results of PCA of  $^1\text{H}$  NMR spectra of serum obtained from 298 dairy cows in early lactation from the Ellinbank research farm (Dataset 1,  $N = 248$ ) and a commercial dairy farm in Tasmania (Dataset 2,  $N = 50$ ).

**Table S2.** Results of ANOVA-simultaneous component analysis (ASCA) of  $^1\text{H}$  NMR spectra of bovine serum ( $N = 298$ ). Effect describes the relative influence of each variable (Herd, Age and days in milk (DIM)) on each spectra. P-value is derived from permutation testing (1000 iterations).

| Variable  | PCs | Effect | P-Value |
|-----------|-----|--------|---------|
| Herd      | 1   | 0.47   | 0.33    |
| Age       | 10  | 4.72   | 0.04    |
| DIM       | 20  | 10.17  | 0.09    |
| Residuals | -   | 86.06  | -       |

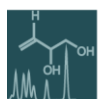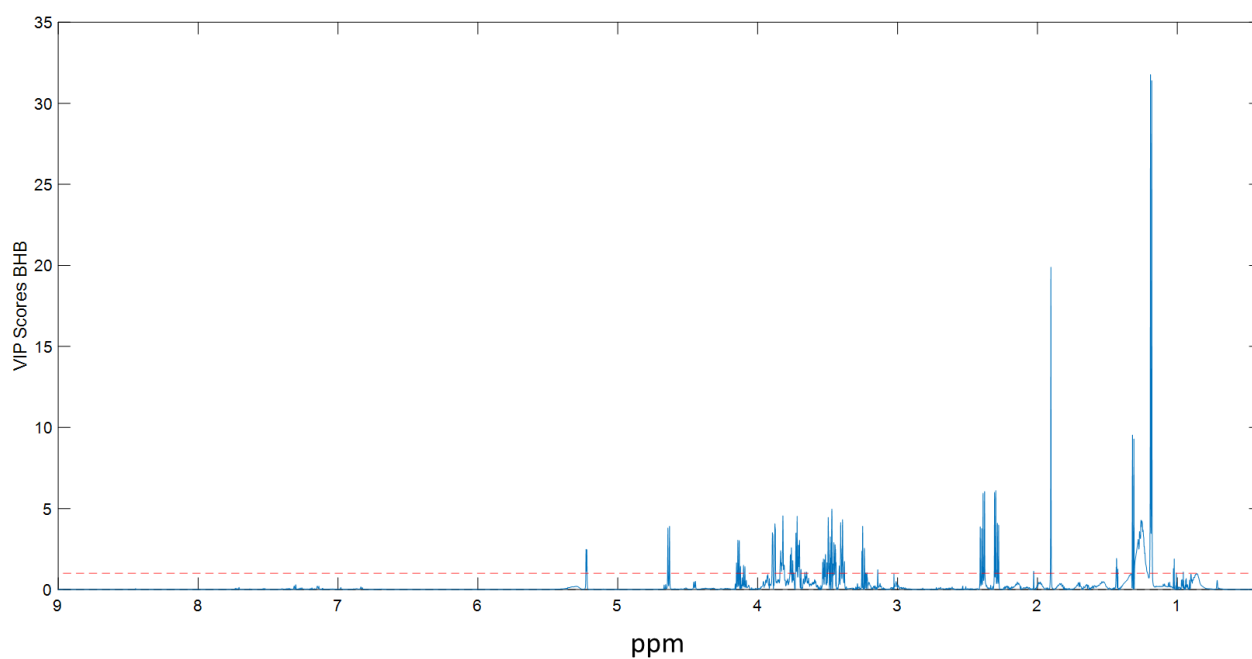

(a)

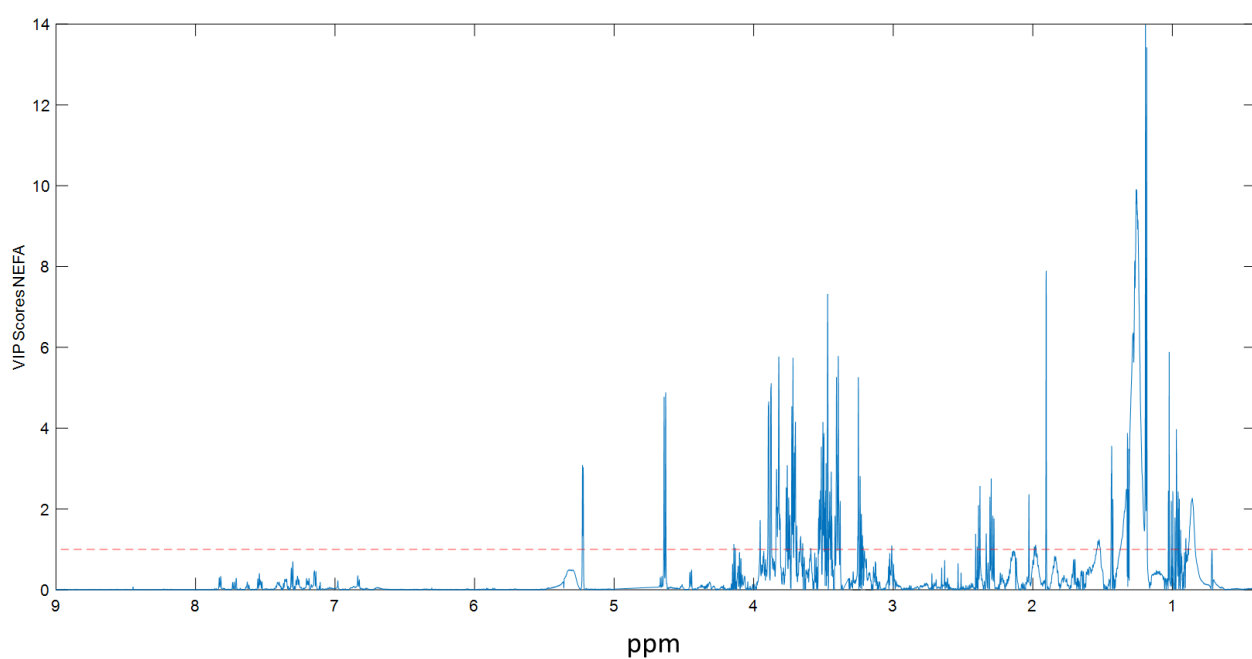

(b)

**Figure S2.** Variable importance of projection (VIP) scores derived from orthogonal partial least squares (OPLS) regression of  $^1\text{H}$  NMR spectra of serum obtained from 298 dairy cows in early lactation, against (a) BHBA concentration and (b) NEFA concentration.
